# Supplementary material for: Halofuginone suppresses gastric tumor growth by inducing ROS-dependent inhibition of the PI3K/AKT pathway
Source: Research Square preprint supplement (doi:10.21203/rs.3.rs-8446424/v1), 2026-02-02
Supplement: Supplementary file 1 [file 2caa447c02f7f0e9e96b07e1.docx]

**Fig2. G**

SGC7901 MKN45


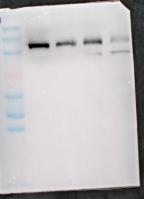

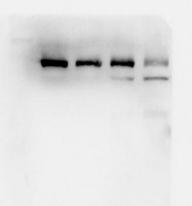


**100-**

-PARP-

-C-PARP-

**70-**

**50-**

**40-**

**35-**

-C-PARP-


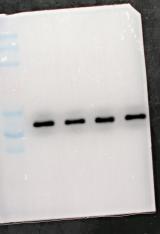


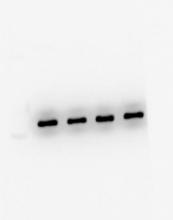


**100-**

**70-**

**50-**

**40-**

-β-Actin-


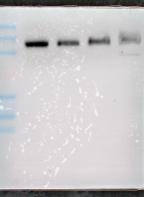


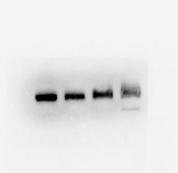


**100-**

-PARP-

-C-PARP-

**70-**

**50-**

**40-**

**35-**


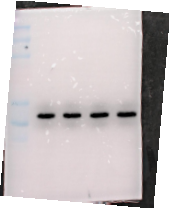

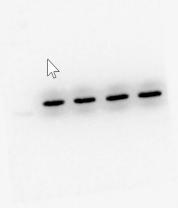


**100-**

**70-**

**50-**

-β-Actin-

**40-**

**Fig. S2G**

SGC7901 MKN45


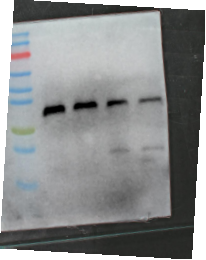
**70-**

**50-**

**40-**

**35-**

-Caspase-3-

-C-Caspase-3-

**25-**

**20-**


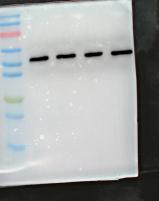


**70-**

**50-**

**40-**

-β-Actin-


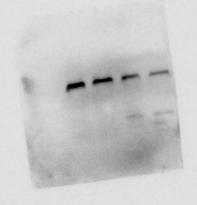


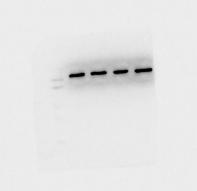


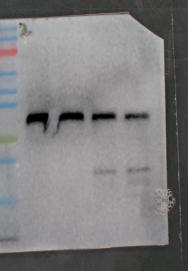


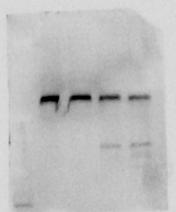


**70-**

**50-**

**40-**

**35-**

**25-**

-Caspase-3-

-C-Caspase-3-

**20-**


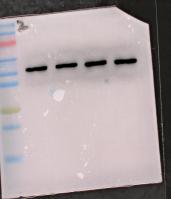

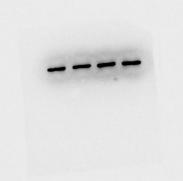


**70-**

-β-Actin-

**50-**

**40-**

**Fig2. G**

SGC7901 MKN45

**70-**

**50-**

**40-**

**35-**

**25-**

**20-**

**15-**


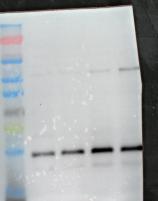


-BAX-


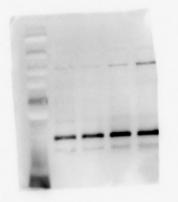


**20-**

**15-**


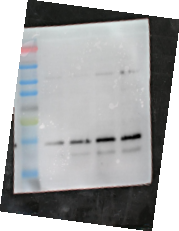
**70-**

**50-**

**40-**

**35-**

**25-**

-BAX-


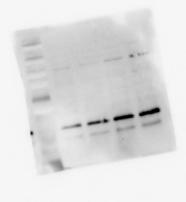


**70-**

**50-**

**40-**


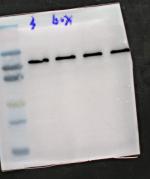


-β-Actin-


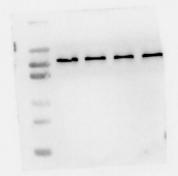


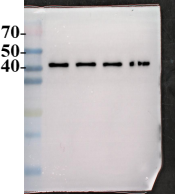


-β-Actin-


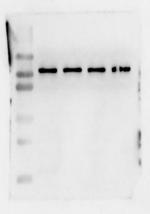


**Fig2.G**

SGC7901 MKN45


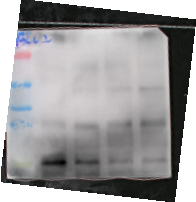

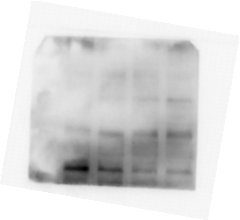


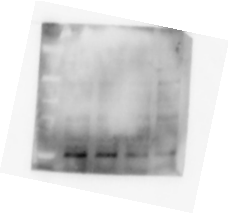


**70-**

**50-**

**40-**

**35-**

**25-**

-BCL-2-


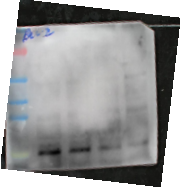


**70-**

**50-**

**40-**

**35-**

-BCL-2-

**25-**


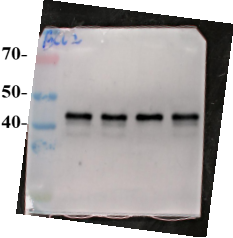

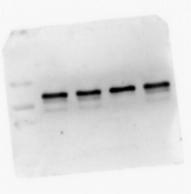


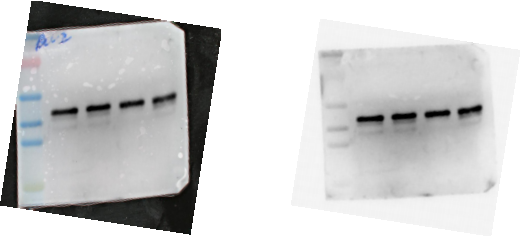
**70-**

-β-Actin-

**50-** -β-Actin-

**40-**

**Fig2.J**

SGC7901 MKN45


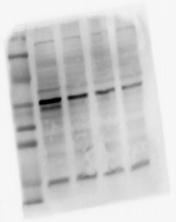


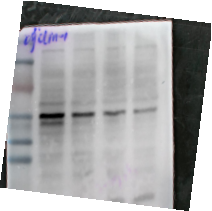
**70-**

- CyclinA2 -

**50-**

**40-**

**35-**


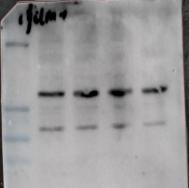


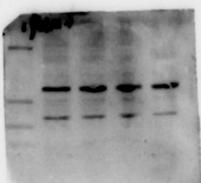


**70-**

**50-**

-β-Actin-

**40-**

| **70-**  **50-**  **40-**  **35-** | 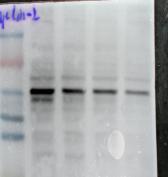 | - CyclinA2 - | 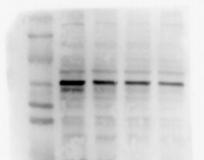 |
| --- | --- | --- | --- |


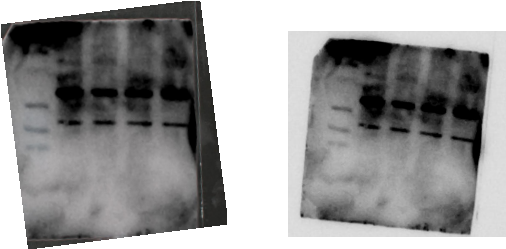
**70-**

**50-**

-β-Actin-

**40-**

**Fig2.J**

SGC7901 MKN45


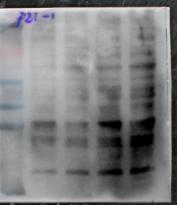


**70-**

**50-**

**40-**

**35-**

**25-**

-P21-


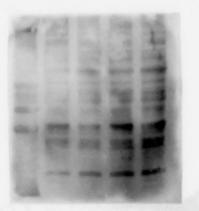


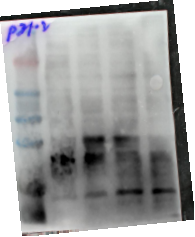
**70**

**50-**

**40-**

**35-**

**25-**

-P21-


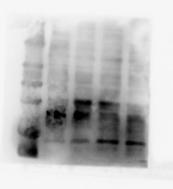


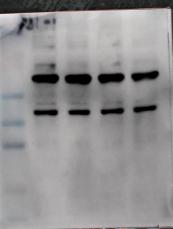


**70-**

**50-**

**40-**

-β-Actin-


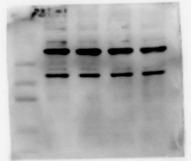


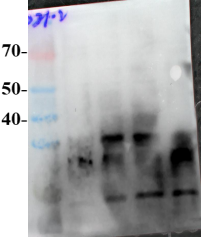


-β-Actin-


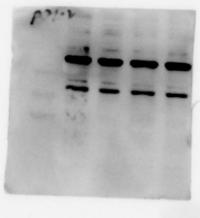


**Fig2.J**

SGC7901 MKN45


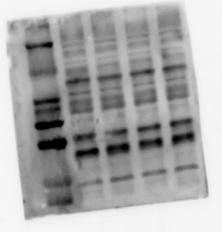


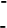


**70**

**50**

**40-**

**35-** -CDK-2-


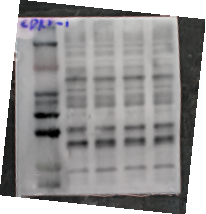


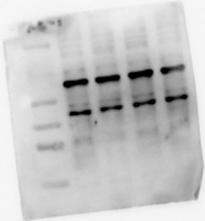


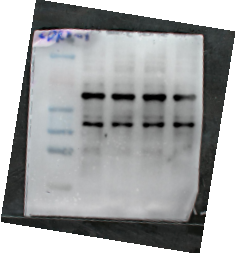
**70-**

**50-**

-β-Actin-

**40-**


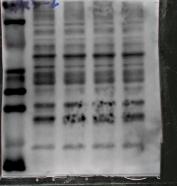


**70-**

**50-**

**40-**

-CDK-2-

**35-**


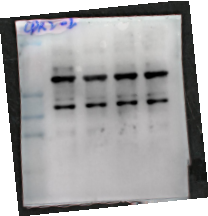
**70-**

-β-Actin-

**50-**

**40-**


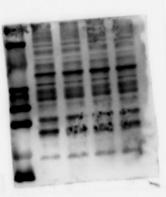


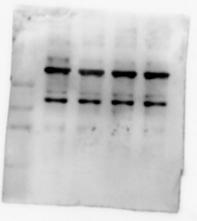


**Fig2.J**

SGC7901 MKN45


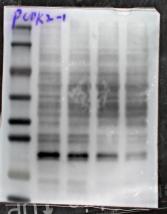


**70-**

**50-**

**40-**

**35-**

-P-CDK2-


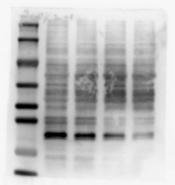


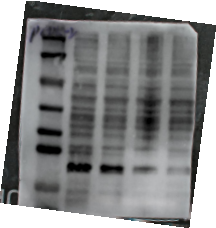
**70-**

**50-**

**40-**

**35-**

-P-CDK2-


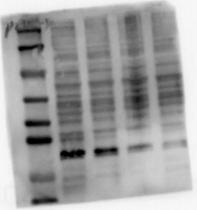


**70-**

**50-**

**40-**


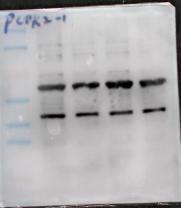


-β-Actin-


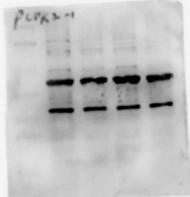


**70-**

**50-**

**40-**


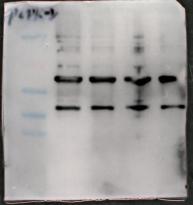


-β-Actin-


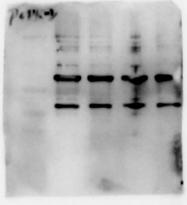


**Fig6.C**


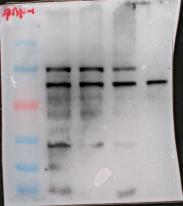
**100-**

**70-**

**50-**

**40-**

**35-**

SGC7901

-Pi3k-


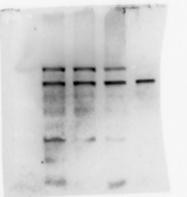


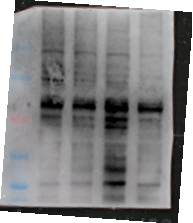
**100-**

**70-**

**50-**

**40-**

**35-**

MKN45


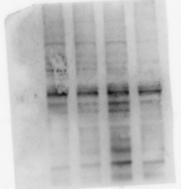


-Pi3k-


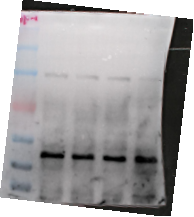
**70-**

**50-**

**40-**

-β-Actin-


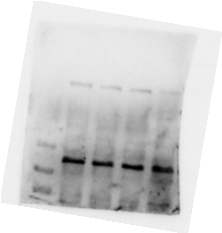


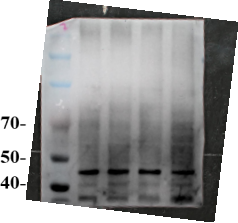


-β-Actin-


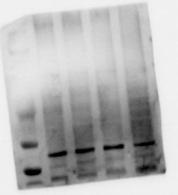


**Fig6.C**

SGC7901


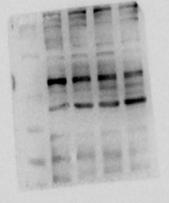


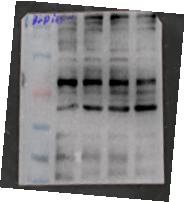
**70-**

**50-**

-P-pi3k-

**40-**

**35**


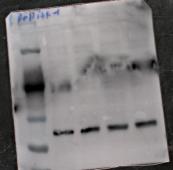


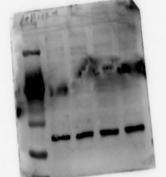


**70-**

**50-**

-β-Actin-

**40-**


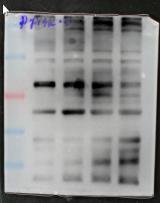


**70-**

**50-**

**40-**


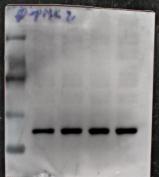


**70-**

**50-**

**40-**

MKN45


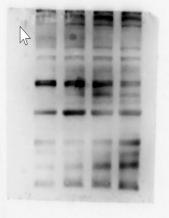


-P-pi3k-


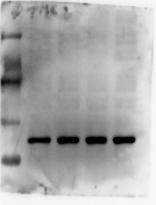


-β-Actin-

**Fig6.C**

SGC7901 MKN45


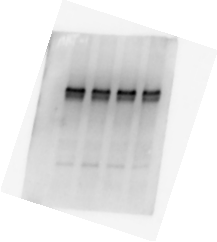


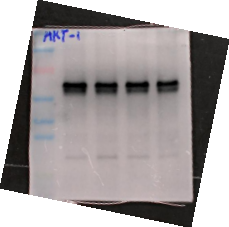
**70-**

-AKT

**50-**

**40-**


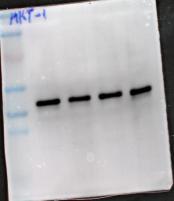

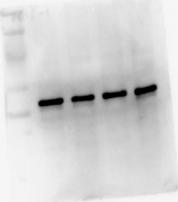


**70-**

**50-**

-β-Actin-

**40-**


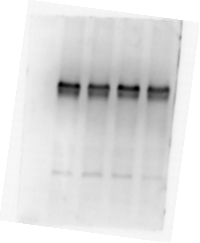


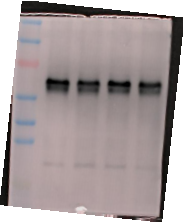
**70-**

**50-**

-AKT

**40-**


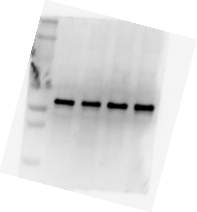


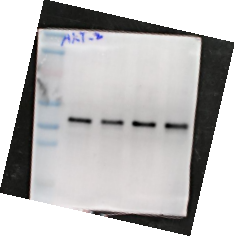
**70-**

-β-Actin-

**50-**

**40-**

**Fig6.C**

SGC7901 MKN45


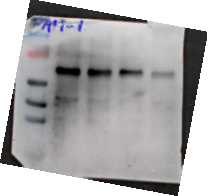
**70-**

**50-**

**40-**

**35-**


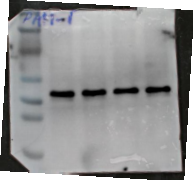
**70-**

**50-**

**40-**


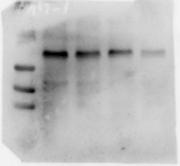


-P-AKT-


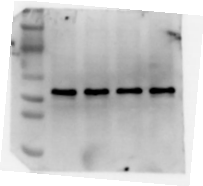
-β-Actin-


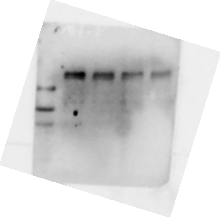


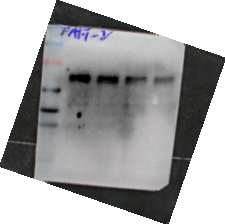
**70-**

**50-**

-P-AKT-

**40-**

**35-**


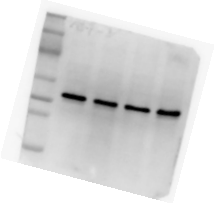


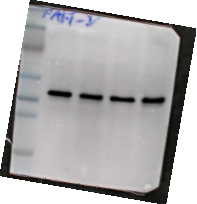
**70-**

**50-**

-β-Actin-

**40-**
